# Supplementary material for: Herbivorous Reef Fish Interaction with the Habitat and Physicochemical Variables in Coral Ecosystems in the Mexican Tropical Pacific
Source: MDPI journal article supplement (doi:10.3390/oceans5010002), 2024-01-04
Supplement: s1 [file s1]

**Journal name:** Oceans

**Article title:** Herbivorous reef fish interaction with the habitat and physicochemical variables in coral ecosystems in the Mexican Tropical Pacific

**Authors names:** Diana Morales-de-Anda, Amílcar Leví Cupul-Magaña\*, Consuelo Aguilar-Betancourt, Gaspar González-Sansón, Fabián Alejandro Rodríguez-Zaragoza, Alma Paola Rodríguez-Troncoso

\*corresponding author: Laboratorio de Ecología Marina (LEMAC), Departamento de Ciencias Biológicas CUCosta Universidad de Guadalajara, 48280, Puerto Vallarta, Jalisco, México. amilcar.cupul@gmail.com

Table S1. Average recorded values of the subsets of explanatory variables: habitat (branching coral, submassive coral, macroalgae and turf) and physicochemical: temperature (°C), MEI, DHW, Chl *a* (mg m<sup>-3</sup>), Kd490 (m<sup>-1</sup>) and PAR (Einstein m<sup>-2</sup>/day<sup>-1</sup>) for Cleofas and Marietas

| Insular system | Year | SST   | MEI   | NPP      | PAR   | Kd490 | Chl <i>a</i> | Branching | Sub-massive | Turf  | Macroalgae |
|----------------|------|-------|-------|----------|-------|-------|--------------|-----------|-------------|-------|------------|
| Marietas       | 2016 | 26.06 | 1.33  | 1482.27  | 50.90 | 0.14  | 0.82         | 8.62      | 2.21        | 20.50 | 0.39       |
|                | 2017 | 25.19 | -0.21 | 16287.76 | 55.93 | 0.28  | 1.87         | 10.66     | 2.13        | 15.55 | 0.78       |
|                | 2018 | 25.17 | -1.29 | 7424.85  | 58.60 | 0.33  | 2.28         | 13.16     | 2.91        | 28.70 | 0.80       |
| Cleofas        | 2016 | 26.56 | 1.33  | 547.47   | 52.52 | 0.05  | 0.32         | 2.03      | 1.09        | 19.53 | 15.03      |
|                | 2017 | 26.73 | -0.21 | 803.27   | 56.64 | 0.07  | 0.50         | 3.91      | 2.93        | 6.13  | 24.24      |
|                | 2018 | 26.15 | -1.29 | 1115.77  | 58.36 | 0.10  | 0.78         | 3.40      | 1.86        | 16.39 | 19.47      |
