# Supplementary material for: Herbivorous Reef Fish Interaction with the Habitat and Physicochemical Variables in Coral Ecosystems in the Mexican Tropical Pacific
Source: MDPI journal article supplement (doi:10.3390/oceans5010002), 2024-01-04
Supplement: s1 [file s1]

**Journal name:** Oceans

**Article title:** Herbivorous reef fish interaction with the habitat and physicochemical variables in coral ecosystems in the Mexican Tropical Pacific

**Authors names:** Diana Morales-de-Anda, Amílcar Leví Cupul-Magaña\*, Consuelo Aguilar-Betancourt, Gaspar González-Sansón, Fabián Alejandro Rodríguez-Zaragoza, Alma Paola Rodríguez-Troncoso

\*corresponding author: Laboratorio de Ecología Marina (LEMAC), Departamento de Ciencias Biológicas CUCosta Universidad de Guadalajara, 48280, Puerto Vallarta, Jalisco, México. amilcar.cupul@gmail.com

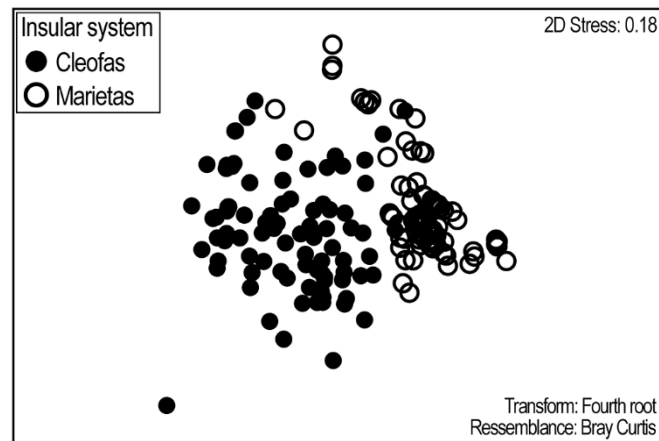

Figure S1: Nonmetric multidimensional scaling (NMDS) of herbivorous fish assemblage in the insular systems (Marietas and Cleofas) from the Mexican Tropical Pacific. Circles represent transects from the sites through time (2016-2018)
