# Supplementary material for: Herbivorous Reef Fish Interaction with the Habitat and Physicochemical Variables in Coral Ecosystems in the Mexican Tropical Pacific
Source: MDPI journal article supplement (doi:10.3390/oceans5010002), 2024-01-04
Supplement: s1 [file s1]

**Article title:** Herbivorous reef fish interaction with the habitat and physicochemical variables in coral ecosystems in the Mexican Tropical Pacific**Authors names:** Diana Morales-de-Anda, Amílcar Leví Cupul-Magaña\*, Consuelo Aguilar-Betancourt, Gaspar González-Sansón, Fabián Alejandro Rodríguez-Zaragoza, Alma Paola Rodríguez-Troncoso

\*corresponding author: Laboratorio de Ecología Marina (LEMAC), Departamento de Ciencias Biológicas CUCosta Universidad de Guadalajara, 48280, Puerto Vallarta, Jalisco, México. amilcar.cupul@gmail.com

Table S2: Description of the physicochemical variables used for the multiple factor analysis (MFA) [75,103–106]

| Physicochemical variable               | Abbreviation | Ecological relevance                                                                                                              | Data details                                                                                                                                                                                                                                      | Data source           |
|----------------------------------------|--------------|-----------------------------------------------------------------------------------------------------------------------------------|---------------------------------------------------------------------------------------------------------------------------------------------------------------------------------------------------------------------------------------------------|-----------------------|
| Surface Temperature                    | SST          | Related corals and algae tolerance and fish composition changes in fish [75,103,106]                                              | SST. Aqua MODIS. NPP. (°C) 0.025 degrees. Pacific Ocean. 14 Day Composite.                                                                                                                                                                        | NOAA-NMFS SWFSC ERD   |
| Degree Heating Week                    | DHW          | Proxy of ENSO. Related to coral mortality, algae overgrowth, and fish composition changes [75,104]                                | Celsius weeks. NOAA Global Coral Bleaching Monitoring Products. Daily 5km.                                                                                                                                                                        | NOAA-Coral Reef Watch |
| Multivariate ENSO Index                | MEI          | Proxy of ENSO phenomena. Related to coral mortality, algae overgrowth and fish, corals, and algae [104]                           | Bi-monthly Multivariate El Niño/Southern Oscillation (ENSO) index (MEI.v2). Empirical Orthogonal Function (EOF) of five variables (sea level pressure, SST, zonal and meridional components of the surface wind, and outgoing longwave radiation) | NOAA-ESRL PSD         |
| Photosynthetically Available Radiation | PAR          | Proxy of solar radiation related to the photosynthetic activity of the algae and coral endosymbionts [75,103]                     | Photosynthetically Available Radiation, R. Frouin (Einstein m-2/day-1). Aqua MODIS. NPPL3SMI. Global, 4km. Science Quality. Monthly.                                                                                                              | NASA-GSFC OBPB        |
| Diffuse Attenuation Coefficient        | Kd490        | Water quality. Proxy of turbidity negatively related to the photosynthetic activity of the algae and coral endosymbionts [75,105] | Diffuse attenuation coefficient at 490 nm, kd2 algorithm (m-1). Science Quality, Global, Level 3. Monthly.                                                                                                                                        | NOAA-NESDIS STAR      |
| Chlorophyll <i>a</i>                   | Chl <i>a</i> | Water quality. Proxy of nutrients that can increase algae growth rates and food availability for fish [75]                        | Chlorophyll Concentration, Default Algorithm (mg m <sup>-3</sup> ). Science Quality. Global. Level 3. Monthly.                                                                                                                                    | NOAA-NESDIS STAR      |
