# Supplementary material for: Herbivorous Reef Fish Interaction with the Habitat and Physicochemical Variables in Coral Ecosystems in the Mexican Tropical Pacific
Source: MDPI journal article supplement (doi:10.3390/oceans5010002), 2024-01-04
Supplement: s1 [file s1]

**Journal name:** Oceans

**Article title:** Herbivorous reef fish interaction with the habitat and physicochemical variables in coral ecosystems in the Mexican Tropical Pacific

**Authors names:** Diana Morales-de-Anda, Amílcar Leví Cupul-Magaña\*, Consuelo Aguilar-Betancourt, Gaspar González-Sansón, Fabián Alejandro Rodríguez-Zaragoza, Alma Paola Rodríguez-Troncoso

\*corresponding author: Laboratorio de Ecología Marina (LEMAC), Departamento de Ciencias Biológicas CUCosta Universidad de Guadalajara, 48280, Puerto Vallarta, Jalisco, México. amilcar.cupul@gmail.com

Table S3: Details of the herbivorous species functional traits used to differentiate between functions based on different feeding strategies amongst herbivorous reef fish from Natural Protected islands in Mexican Tropical Pacific [107-110]

| Species                                                   | Species code | Size <sup>abcd</sup> | Aggregation type <sup>4abcd</sup> | Mobility <sup>bcd</sup> | Feeding mode <sup>bcd</sup> | Position <sup>bcd</sup> | Q/B <sup>b</sup> |
|-----------------------------------------------------------|--------------|----------------------|-----------------------------------|-------------------------|-----------------------------|-------------------------|------------------|
| <i>Acanthurus nigricans</i> (Linnaeus 1758)               | Anig         | 1:0.1-7              | 2: Small                          | 2: Within               | 3: Grazer                   | 2: Above                | 39.3             |
| <i>Acanthurus triostegus</i> (Linnaeus 1758)              | Atri         | 1:0.1-7              | 2: Small                          | 2: Within               | 3: Grazer                   | 2: Above                | 38.2             |
| <i>Acanthurus xanthopterus</i> Valenciennes 1835          | Axan         | 2:7.1-15             | 2: Small                          | 3: Between              | 3: Grazer                   | 2: Above                | 18               |
| <i>Kyphosus vaigiensis</i> (Quoy & Gaimard 1825)          | Kana         | 2:7.1-15             | 1: Solitary                       | 3: Between              | 3: Grazer                   | 2: Above                | 30.1             |
| <i>Kyphosus elegans</i> (Peters 1869)                     | Kele         | 2:7.1-15             | 1: Solitary                       | 3: Between              | 2: Browser                  | 2: Above                | 27.3             |
| <i>Microspathodon dorsalis</i> (Gill 1862)                | Mdor         | 2:7.1-15             | 1: Solitary                       | 1: Sedentary            | 2: Browser                  | 1: Bottom               | 33.8             |
| <i>Nicholsina denticulata</i> (Evermann & Radcliffe 1917) | Nden         | 2:7.1-15             | 1: Solitary                       | 2: Within               | 4: Scraper                  | 2: Above                | 24.3             |
| <i>Prionurus laticlavius</i> (Valenciennes 1846)          | Ppun         | 2:7.1-15             | 3: Large                          | 2: Within               | 3: Grazer                   | 2: Above                | 19.1             |
| <i>Scarus ghobban</i> Forsskål 1775                       | Sgho         | 2:7.1-15             | 1: Solitary                       | 2: Within               | 4: Scraper                  | 2: Above                | 16.6             |
| <i>Scarus perrico</i> Jordan & Gilbert 1882               | Sper         | 3:15.1-30            | 1: Solitary                       | 2: Within               | 4: Scraper                  | 2: Above                | 19.7             |
| <i>Scarus rubroviolaceus</i> Bleeker 1847                 | Srub         | 3:15.1-30            | 1: Solitary                       | 2: Within               | 4: Scraper                  | 2: Above                | 17.7             |
| <i>Stegastes acapulcoensis</i> (Fowler 1944)              | Saca         | 1:0.1-7              | 1: Solitary                       | 2: Within               | 1: Farmer                   | 1: Bottom               | 48.5             |
| <i>Stegastes flavilatus</i> (Gill 1862)                   | Sfla         | 1:0.1-7              | 1: Solitary                       | 1: Sedentary            | 1: Farmer                   | 2: Above                | 48.9             |

Size (mean observed length in cm), 3 ordered categories: 0.1-7cm, 7.1-15cm, 15.1-30cm. Aggregation type (number of individuals found on social schooling), 3 categories ordered: Solitary (single), Small (3-20 individuals), Large (> 20 ind.). Mobility (common range movement), 3 categories: Sedentary (site attached species), Within (stay within reefs), Between (move to other reefs). Feeding type (common type of algae consumption), 4 categories: Farmer (territorial algal farming), Grazer (feeds superficially on epithelial turf algae), Browser (feeds on macroalgae frond), Scraper (feeds by scraping on epithelial turf algae generally leaving marks). Position (position on the water column), 2 categories: Above (moving on the water column), Bottom (Near or attached to the bottom). Q/B (food consumption per biomass ratio), continuous trait.

References: <sup>a</sup>own data; <sup>b</sup>web search: FishBase [107]; Shorefishes of the Tropical Eastern Pacific [108]; <sup>c</sup>field experience A.L. Cupul-Magaña Pers.Comm.; and <sup>d</sup>scientific literature: [109,110].
