# Supplementary material for: Herbivorous Reef Fish Interaction with the Habitat and Physicochemical Variables in Coral Ecosystems in the Mexican Tropical Pacific
Source: MDPI journal article supplement (doi:10.3390/oceans5010002), 2024-01-04
Supplement: s1 [file s1]

**Journal name:** Oceans

**Article title:** Herbivorous reef fish interaction with the habitat and physicochemical variables in coral ecosystems in the Mexican Tropical Pacific

**Authors names:** Diana Morales-de-Anda, Amílcar Leví Cupul-Magaña\*, Consuelo Aguilar-Betancourt, Gaspar González-Sansón, Fabián Alejandro Rodríguez-Zaragoza, Alma Paola Rodríguez-Troncoso

\*corresponding author: Laboratorio de Ecología Marina (LEMAC), Departamento de Ciencias Biológicas CUCosta Universidad de Guadalajara, 48280, Puerto Vallarta, Jalisco, México. amilcar.cupul@gmail.com

TableS4: Temporal and spatial SIMPER analysis summary. Total percentage of dissimilarity between pairs (in parenthesis) and percentage of contribution to the dissimilarity between levels per herbivorous fish in insular systems from Mexican Tropical Pacific. Blank spaces represent that in that between the pairs, the species did not contribute to the total percentage dissimilarity

| Species                        | Marietas vs.<br>Cleofas (61%) | Cold vs.<br>Warm (31%) | 2013 vs.<br>2014 (28%) | 2013 vs.<br>2015 (31%) | 2013 vs.<br>2016 (30%) | 2013 vs.<br>2017 (31%) | 2013 vs.<br>2018 (32%) | 2014 vs.<br>2015 (30%) | 2014 vs.<br>2016 (30%) |
|--------------------------------|-------------------------------|------------------------|------------------------|------------------------|------------------------|------------------------|------------------------|------------------------|------------------------|
| <i>Stegastes acapulcoensis</i> | 16.4                          | 24.42                  | 23.73                  | 25.47                  | 23.13                  | 25.02                  | 27.42                  | 24.45                  | 21.97                  |
| <i>Prionurus laticlavus</i>    | 13.05                         | 24.56                  | 22.95                  | 21.33                  | 21.79                  | 24.39                  | 20.01                  | 23.42                  | 23.48                  |
| <i>Microspathodon dorsalis</i> | 13.69                         | 16.72                  | 16.56                  | 17.44                  | 14.72                  | 14.98                  | 16.83                  | 18.73                  | 16.35                  |
| <i>Stegastes flavilatus</i>    | 5.39                          | 12.66                  | 11.99                  | 10.87                  | 11.32                  | 13.3                   | 14.86                  | 13.91                  | 13.61                  |
| <i>Kyphosus elegans</i>        |                               | 8.98                   | 11.08                  | 11.62                  | 11.22                  | 11.11                  | 9.69                   | 7.55                   | 7.64                   |
| <i>Scarus perrico</i>          |                               | 4.8                    | 3.4                    | 5.27                   | 5.91                   | 3.88                   | 5.03                   | 3.82                   | 4.24                   |
| <i>Acanthurus xanthopterus</i> | 14.27                         |                        | 3.23                   |                        | 3.58                   |                        |                        |                        |                        |
| <i>Acanthurus nigricans</i>    | 12.93                         |                        |                        |                        |                        |                        |                        |                        | 3.35                   |
| <i>Scarus rubroviolaceus</i>   | 10.96                         |                        |                        |                        |                        |                        |                        |                        |                        |
| <i>Acanthurus triostegus</i>   | 8.02                          |                        |                        |                        |                        |                        |                        |                        |                        |
| Species                        | 2014 vs. 2017<br>(30%)        | 2014 vs. 2018<br>(31%) | 2015 vs.<br>2016 (32%) | 2015 vs.<br>2017 (31%) | 2015 vs.<br>2018 (33%) | 2016 vs.<br>2017 (31%) | 2016 vs.<br>2018 (33%) | 2017 vs.<br>2018 (33%) |                        |
| <i>Stegastes acapulcoensis</i> | 23.96                         | 25.38                  | 23.42                  | 26.33                  | 27.02                  | 23.62                  | 24.89                  | 27.41                  |                        |
| <i>Prionurus laticlavus</i>    | 27.62                         | 22.41                  | 22.56                  | 24.83                  | 21.31                  | 26.06                  | 21.25                  | 25.68                  |                        |
| <i>Microspathodon dorsalis</i> | 16.39                         | 17.93                  | 17.28                  | 18.11                  | 19.51                  | 14.99                  | 16.87                  | 17.47                  |                        |
| <i>Stegastes flavilatus</i>    | 15.6                          | 17.21                  | 12.15                  | 13.51                  | 14.48                  | 13.25                  | 14.59                  | 14.39                  |                        |
| <i>Kyphosus elegans</i>        | 7.09                          | 7.26                   | 7.71                   | 7.42                   | 7.91                   | 7.46                   | 7.72                   | 7.47                   |                        |
| <i>Scarus perrico</i>          |                               |                        | 6.39                   |                        |                        | 4.94                   | 6.01                   |                        |                        |
| <i>Acanthurus xanthopterus</i> |                               |                        | 3.05                   |                        |                        |                        |                        |                        |                        |
